# Supplementary material for: Unraveling the Physicochemical Properties and Bacterial Communities in Rabbit Meat during Chilled Storage
Source: MDPI journal article supplement (doi:10.3390/foods13040623), 2024-02-19
Supplement: s1 [file s1]

## 1.1 Supplementary Figures

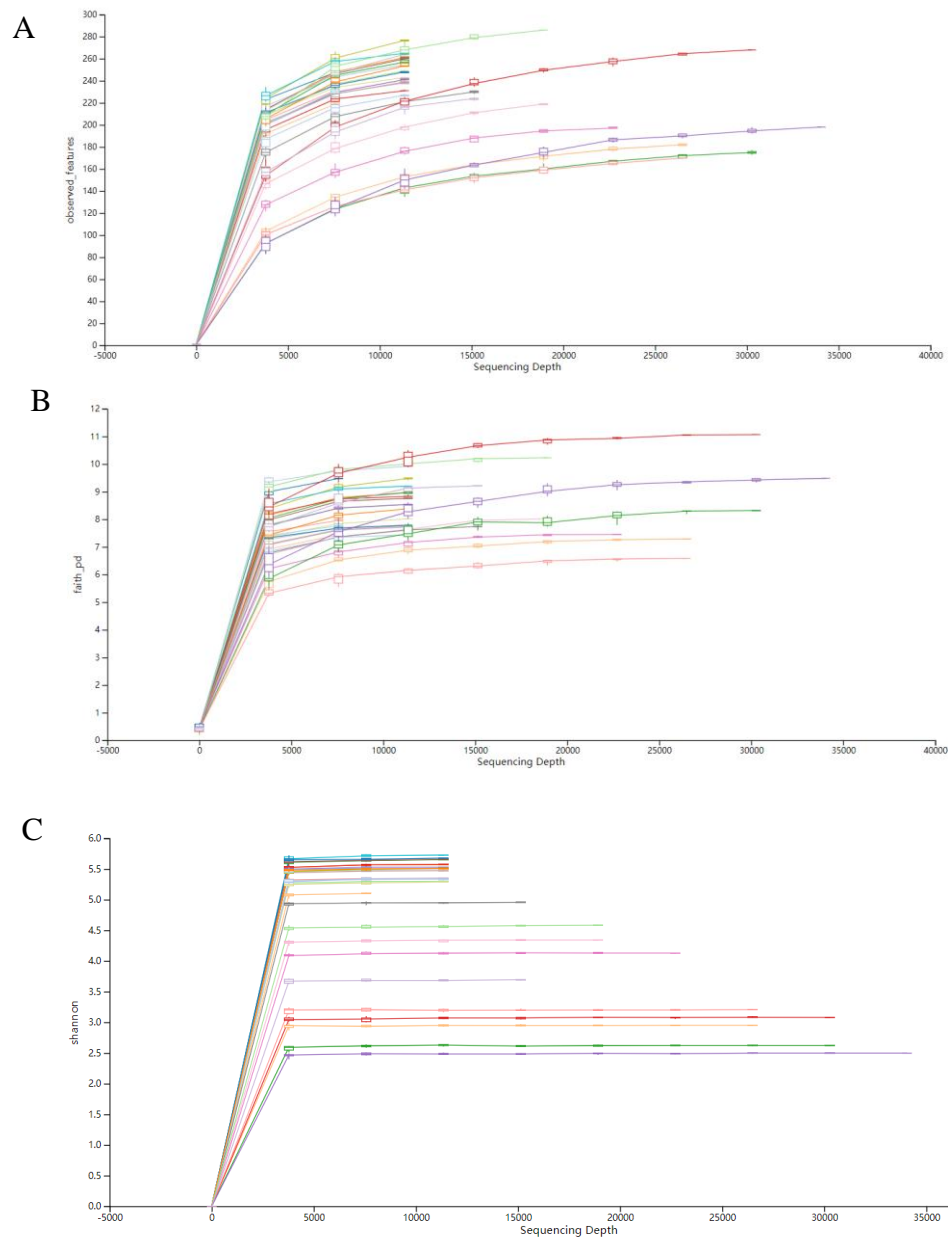

**Figure S1. Rarefaction curves of the meat microbiota.** Curves of observed features (A), faith PD (B), and shannon indices (C).
